# Supplementary material for: The magnitude of the snow-sourced reactive nitrogen flux to the boundary layer in the Uintah Basin, Utah, USA
Source: Copernicus journal article supplement (doi:10.5194/acp-16-13837-2016), 2016-11-09
Supplement: Supplementary file 13 [file acp-16-13837-2016-supplement.zip]

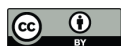

## *Supplement of*

# **The magnitude of the snow-sourced reactive nitrogen flux to the boundary layer in the Uintah Basin, Utah, USA**

**Maria Zatko et al.**

*Correspondence to:* Becky Alexander (beckya@uw.edu)

- acp-16-13837-2016-supplement-title-page.pdf
- acp-2016-320-supplement-version5

– SupplementalMaterial

- \* Figure10A.eps
- \* Figure10B.pdf
- \* Figure11A.eps
- \* Figure11B.pdf
- \* Figure12A.eps
- \* Figure12B.pdf
- \* Figure13A.eps
- \* Figure13B.pdf
- \* Figure14A.eps
- \* Figure14B.pdf
- \* Figure15A.eps
- \* Figure15B.pdf
- \* Figure16A.eps
- \* Figure1A.eps
- \* Figure1B.pdf
- \* Figure2A.eps
- \* Figure2B.eps
- \* Figure3A.eps
- \* Figure3B.eps
- \* Figure4A.eps
- \* Figure4B.pdf
- \* Figure5A.eps
- \* Figure5B.pdf
- \* Figure6A.eps

- \* Figure6B.pdf
- \* Figure7A.eps
- \* Figure7B.pdf
- \* Figure8A.eps
- \* Figure8B.pdf
- \* Figure9A.eps
- \* Figure9B.pdf
- \* Snow\_SurfaceIrradiance\_ActinicFlux.xlsx
- \* Zatko\_et al\_2016\_SupplementalMaterial.docx

The copyright of individual parts of the supplement might differ from the CC-BY 3.0 licence.
