# Supplementary figures and images for: The magnitude of the snow-sourced reactive nitrogen flux to the boundary layer in the Uintah Basin, Utah, USA
Source: Copernicus journal article supplement (doi:10.5194/acp-16-13837-2016), 2016-11-09

NOAA HYSPLIT MODEL  
Backward trajectories ending at 0600 UTC 20 Jan 14  
GDAS Meteorological Data

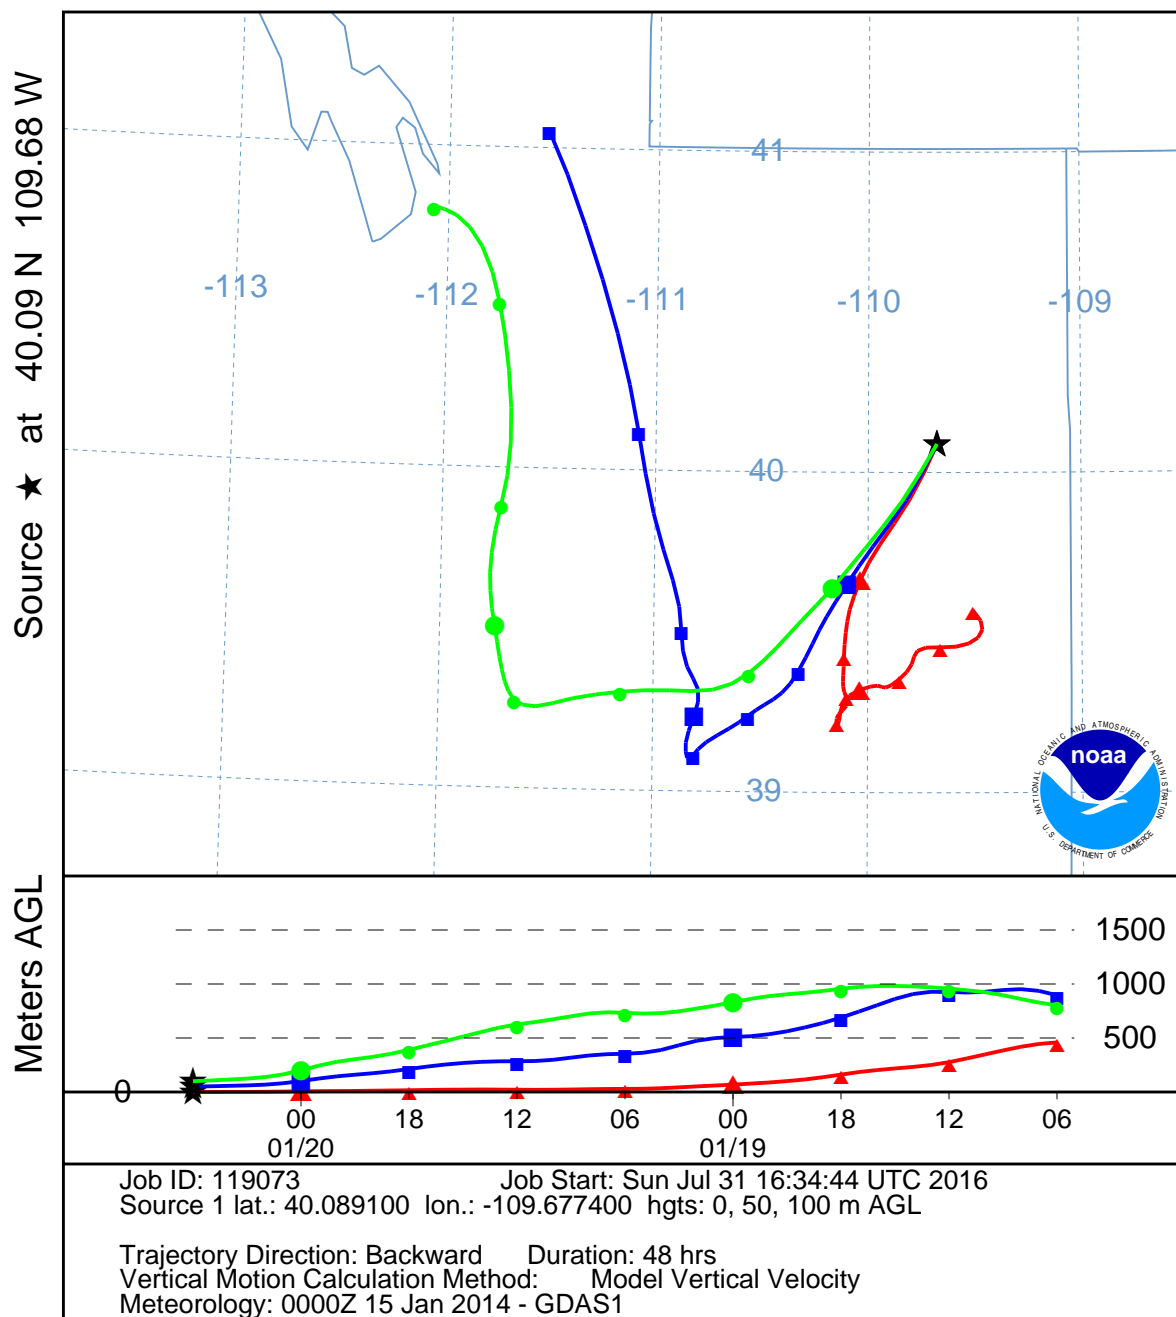

Supplement: Supplementary file 1 [file acp-16-13837-2016-supplement.zip]

NOAA HYSPLIT MODEL  
Backward trajectories ending at 0600 UTC 22 Jan 14  
GDAS Meteorological Data

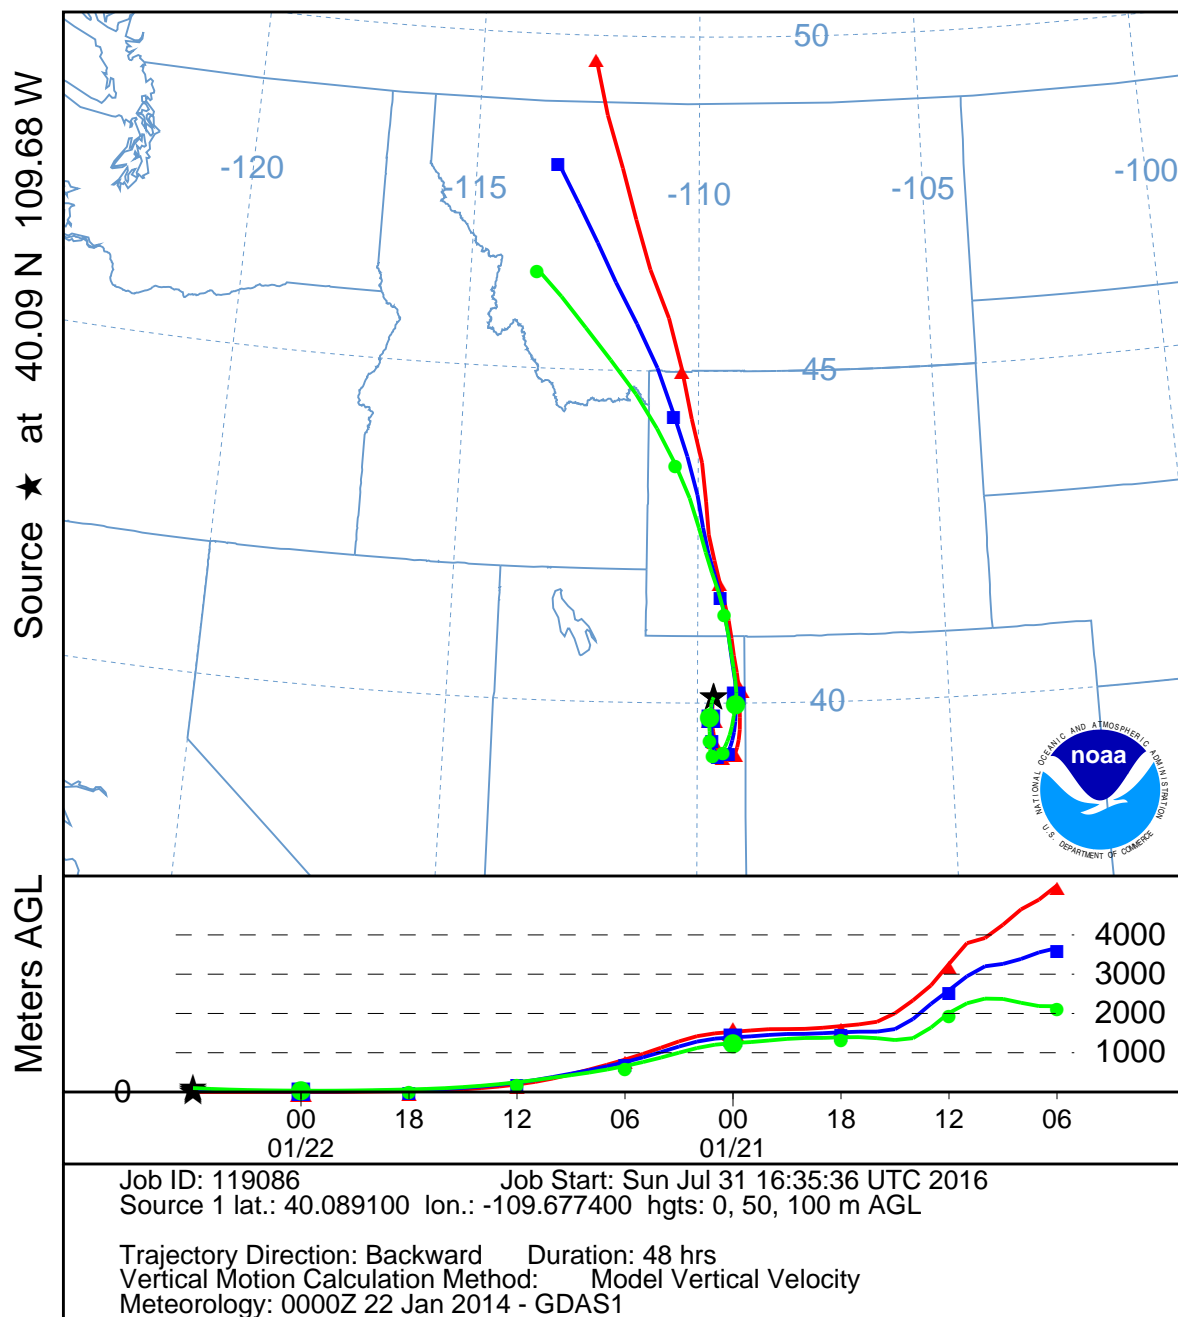

Supplement: Supplementary file 2 [file acp-16-13837-2016-supplement.zip]

NOAA HYSPLIT MODEL  
Backward trajectories ending at 0600 UTC 17 Jan 14  
GDAS Meteorological Data

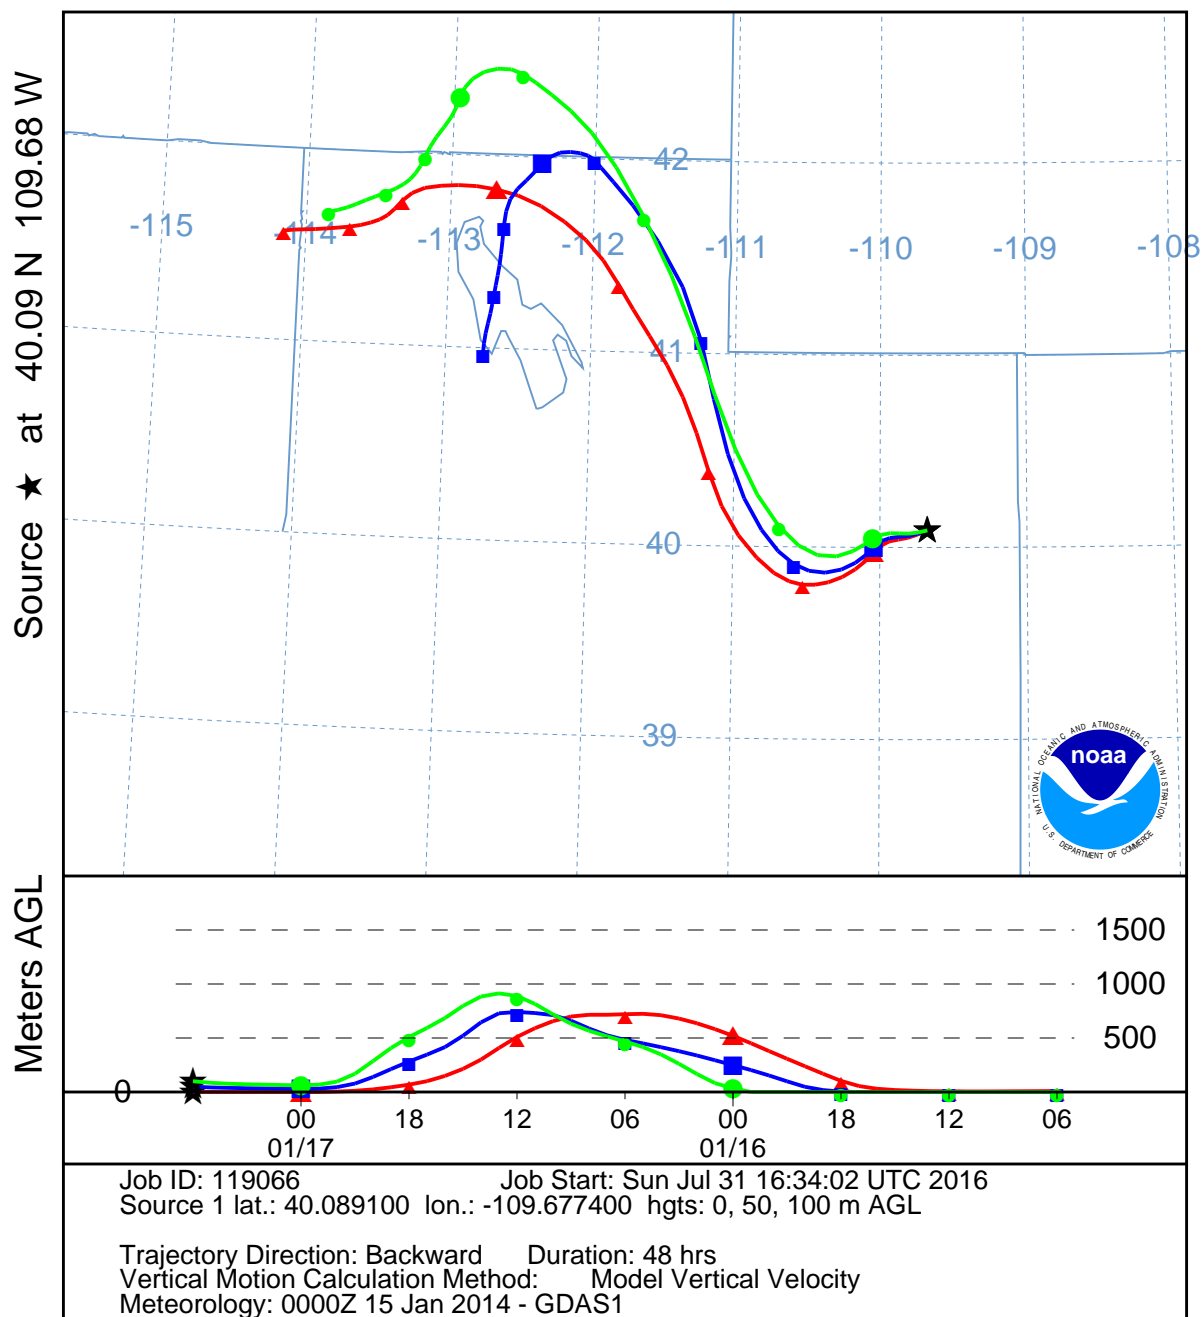

Supplement: Supplementary file 3 [file acp-16-13837-2016-supplement.zip]

NOAA HYSPLIT MODEL  
Backward trajectories ending at 0600 UTC 11 Feb 14  
GDAS Meteorological Data

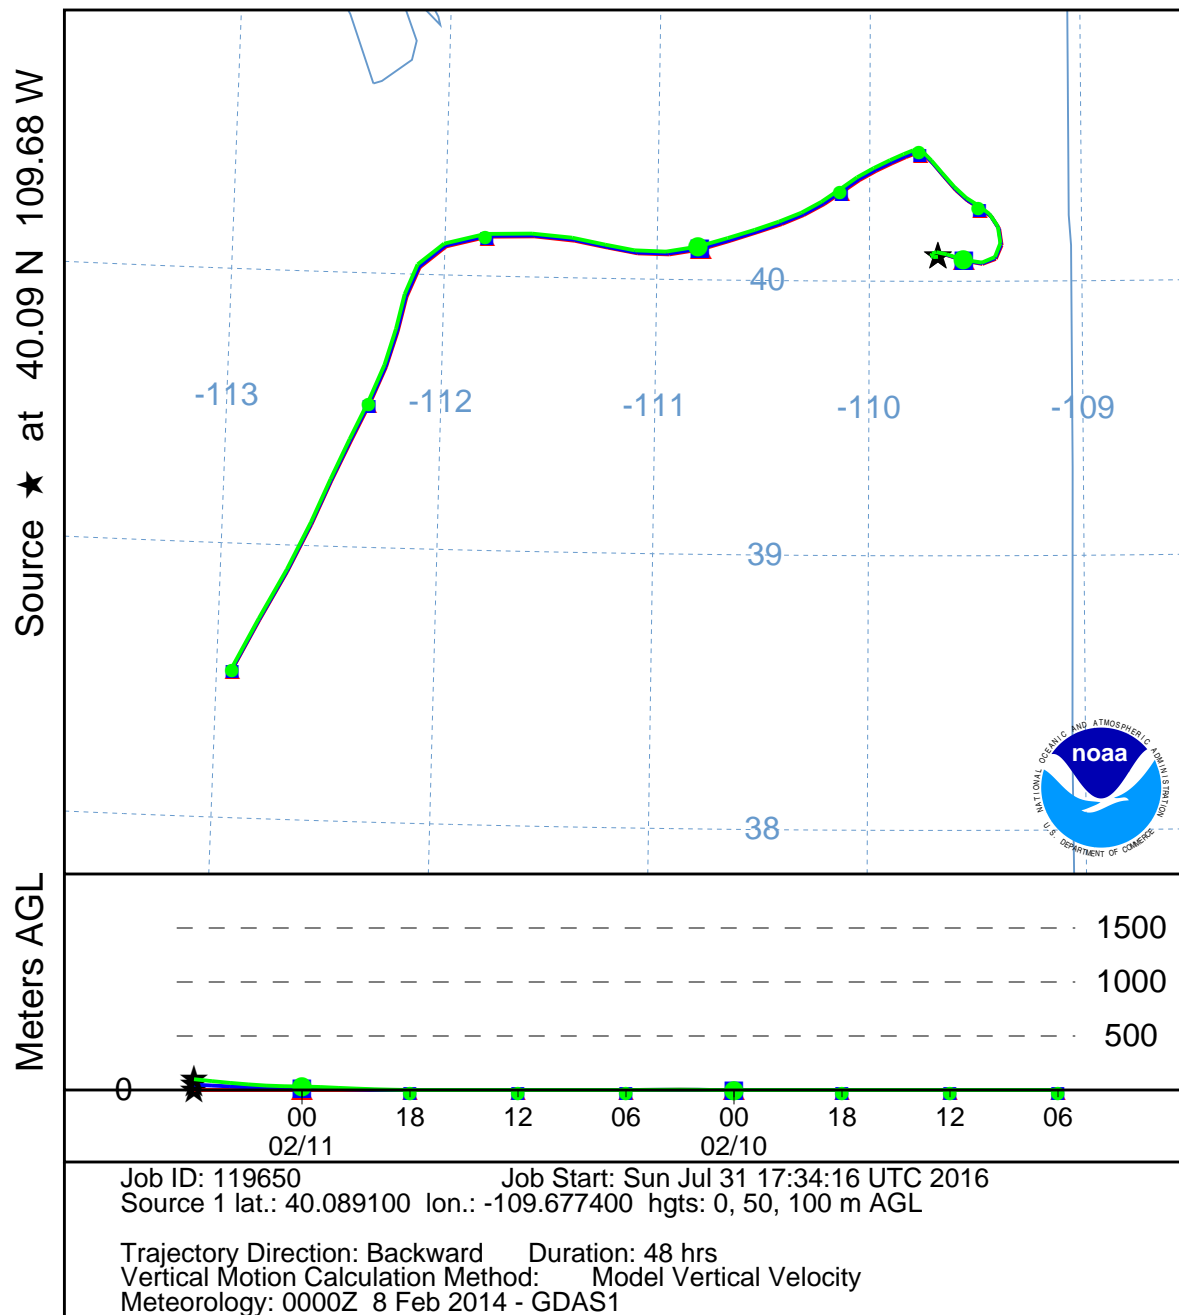

Supplement: Supplementary file 4 [file acp-16-13837-2016-supplement.zip]

NOAA HYSPLIT MODEL  
Backward trajectories ending at 0600 UTC 06 Feb 14  
GDAS Meteorological Data

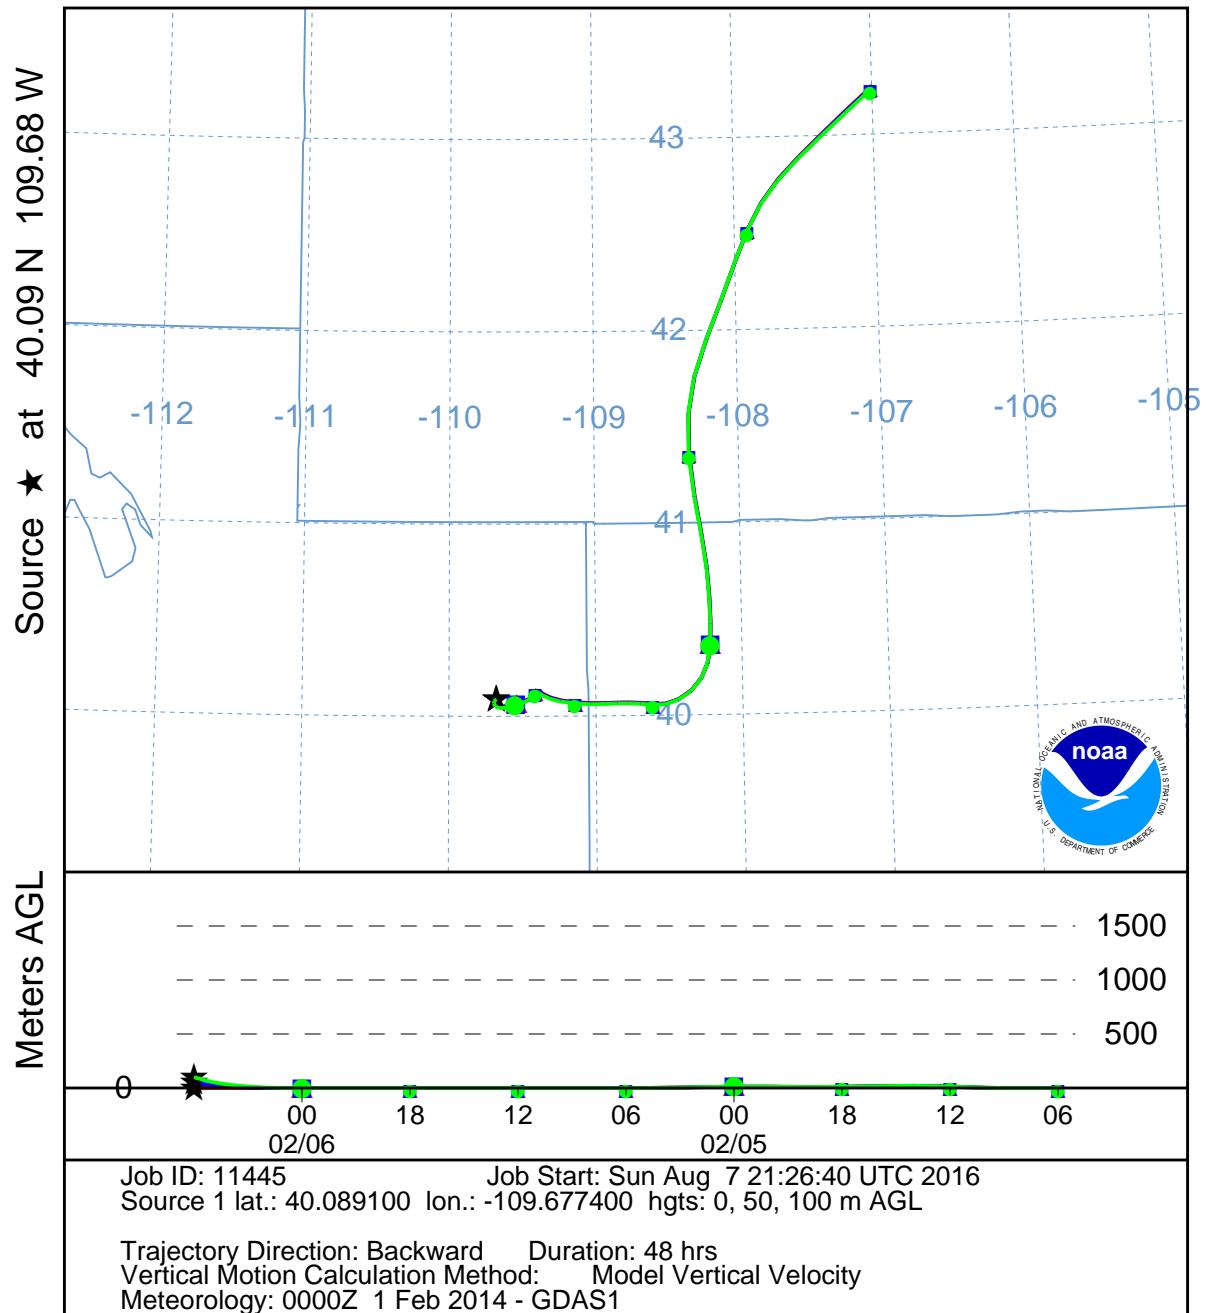

Supplement: Supplementary file 5 [file acp-16-13837-2016-supplement.zip]

NOAA HYSPLIT MODEL  
Backward trajectories ending at 0600 UTC 04 Feb 14  
GDAS Meteorological Data

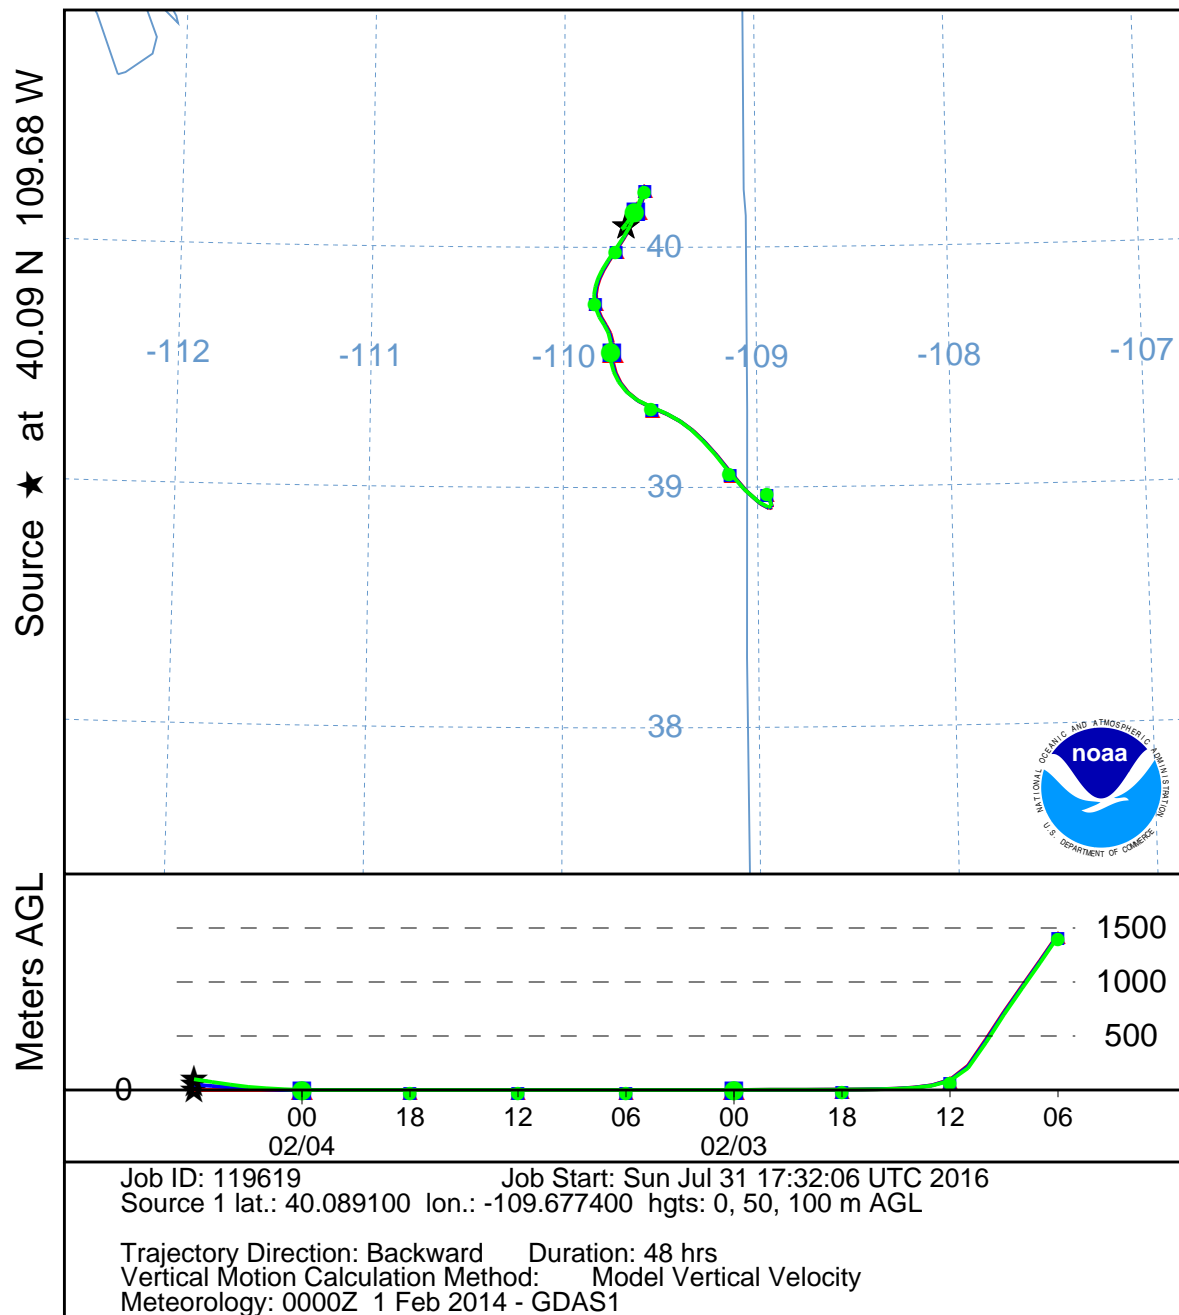

Supplement: Supplementary file 6 [file acp-16-13837-2016-supplement.zip]

NOAA HYSPLIT MODEL  
Backward trajectories ending at 0600 UTC 31 Jan 14  
GDAS Meteorological Data

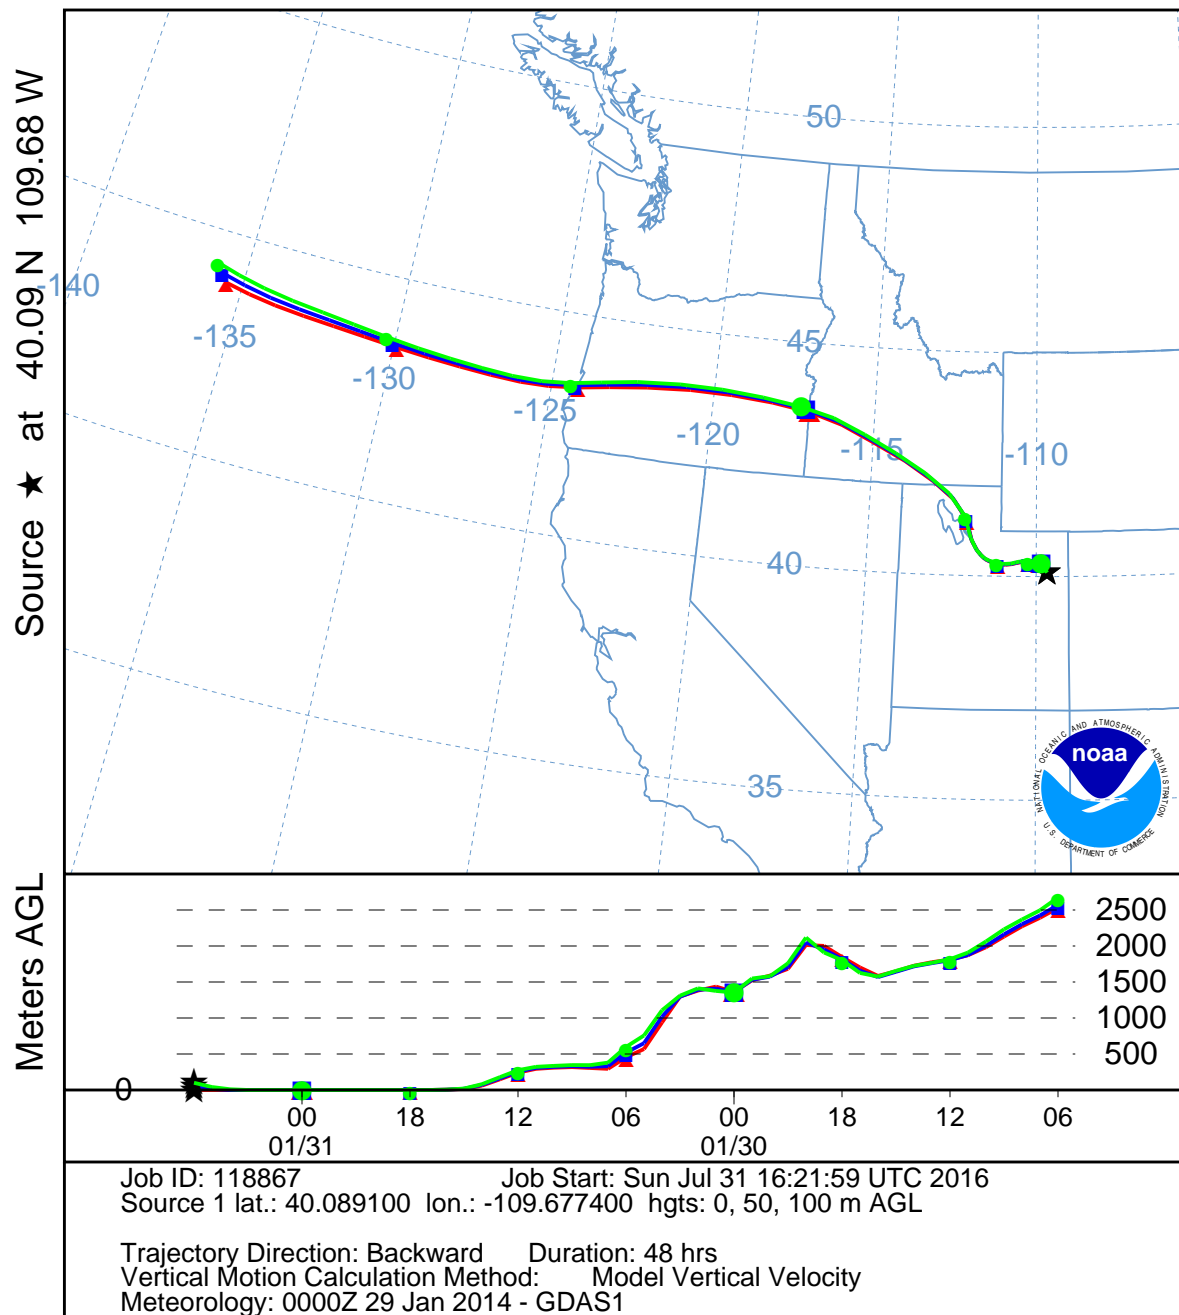

Supplement: Supplementary file 7 [file acp-16-13837-2016-supplement.zip]

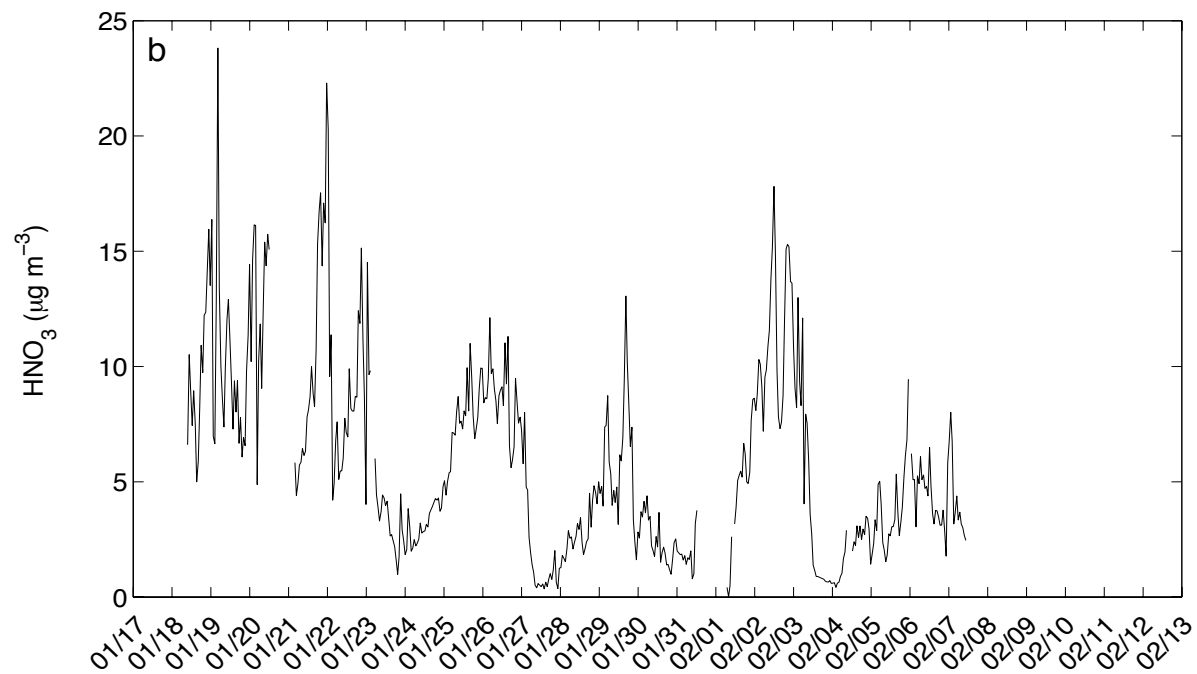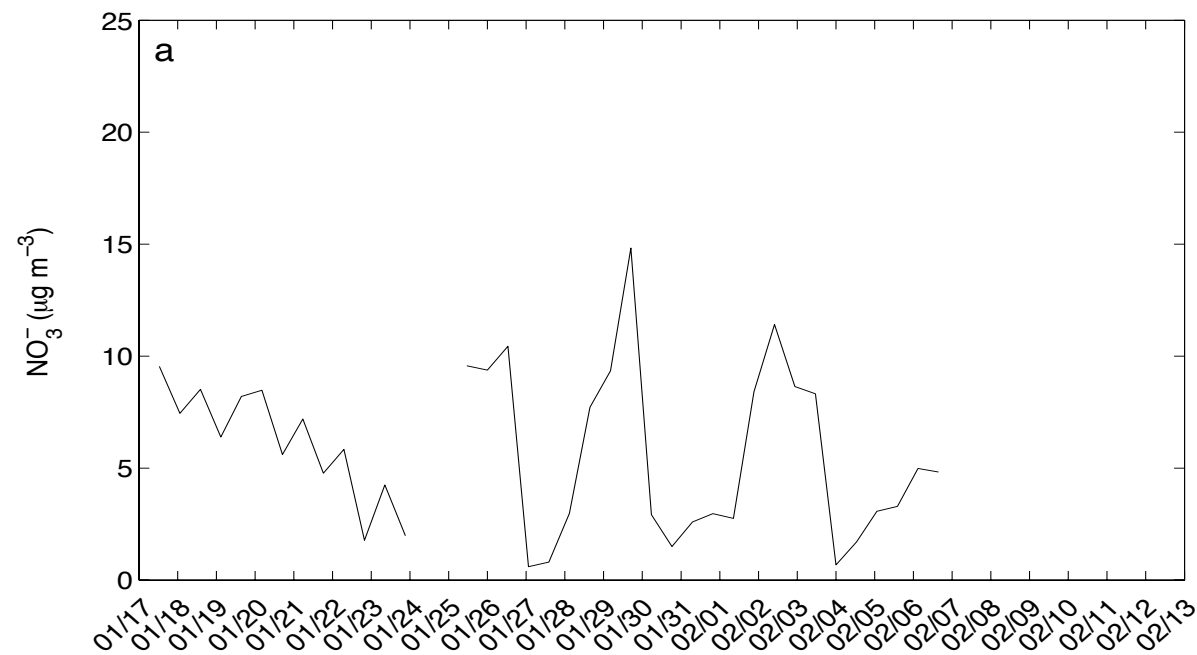

2014

Supplement: Supplementary file 8 [file acp-16-13837-2016-supplement.zip]

NOAA HYSPLIT MODEL  
Backward trajectories ending at 0600 UTC 26 Jan 14  
GDAS Meteorological Data

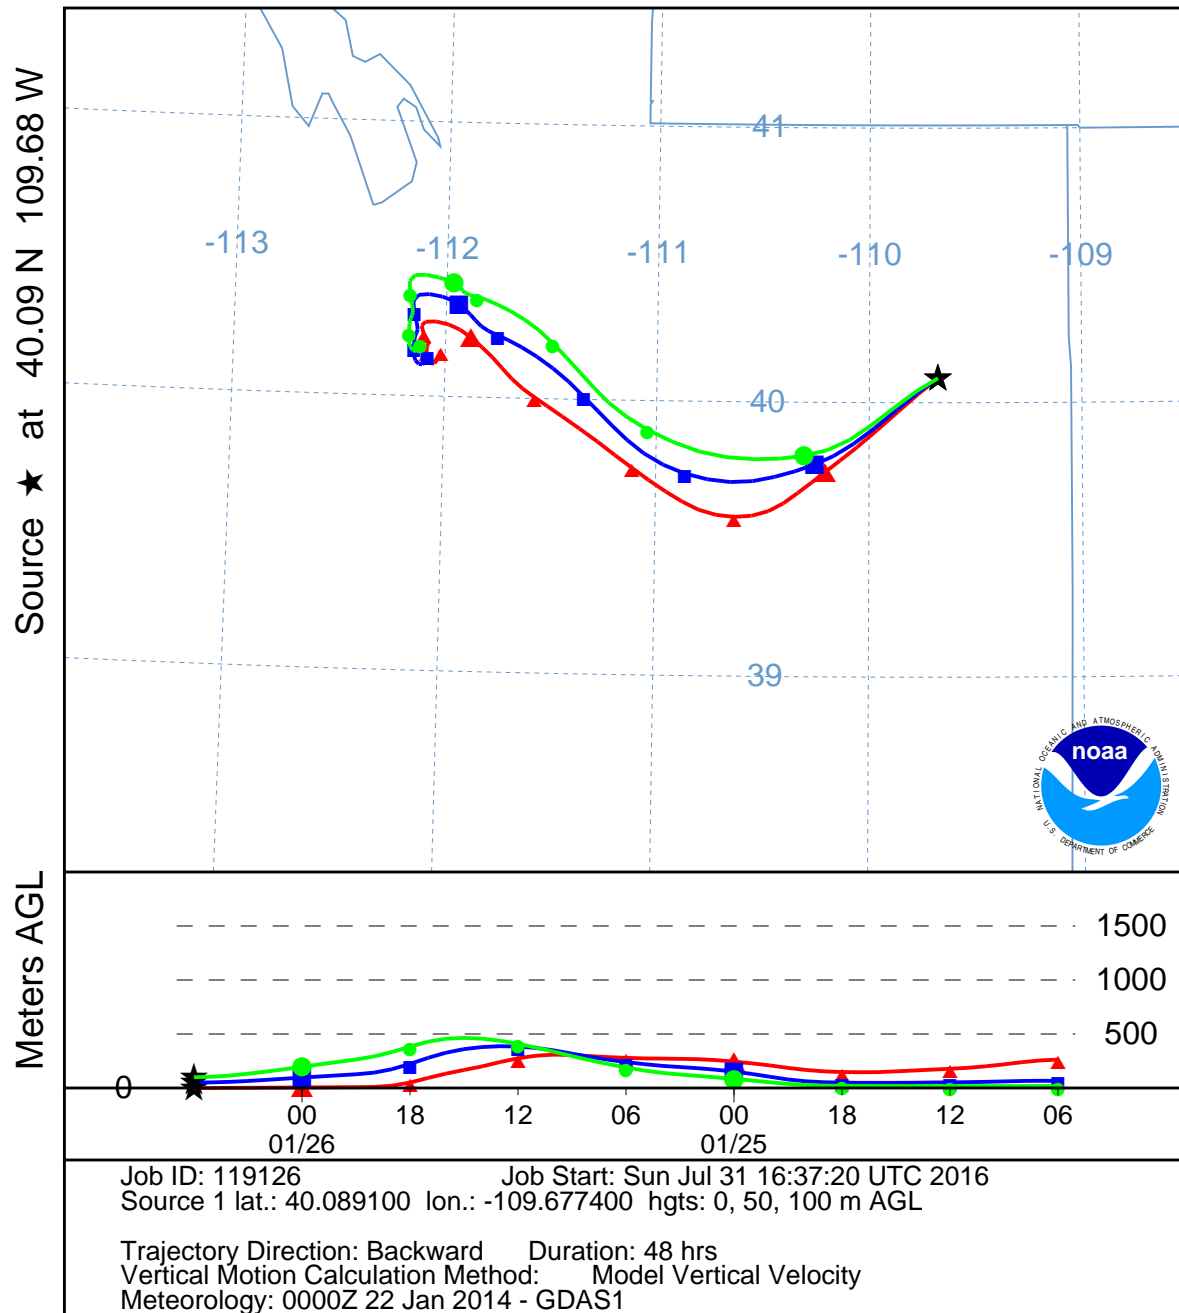

Supplement: Supplementary file 9 [file acp-16-13837-2016-supplement.zip]

NOAA HYSPLIT MODEL  
Backward trajectories ending at 0600 UTC 24 Jan 14  
GDAS Meteorological Data

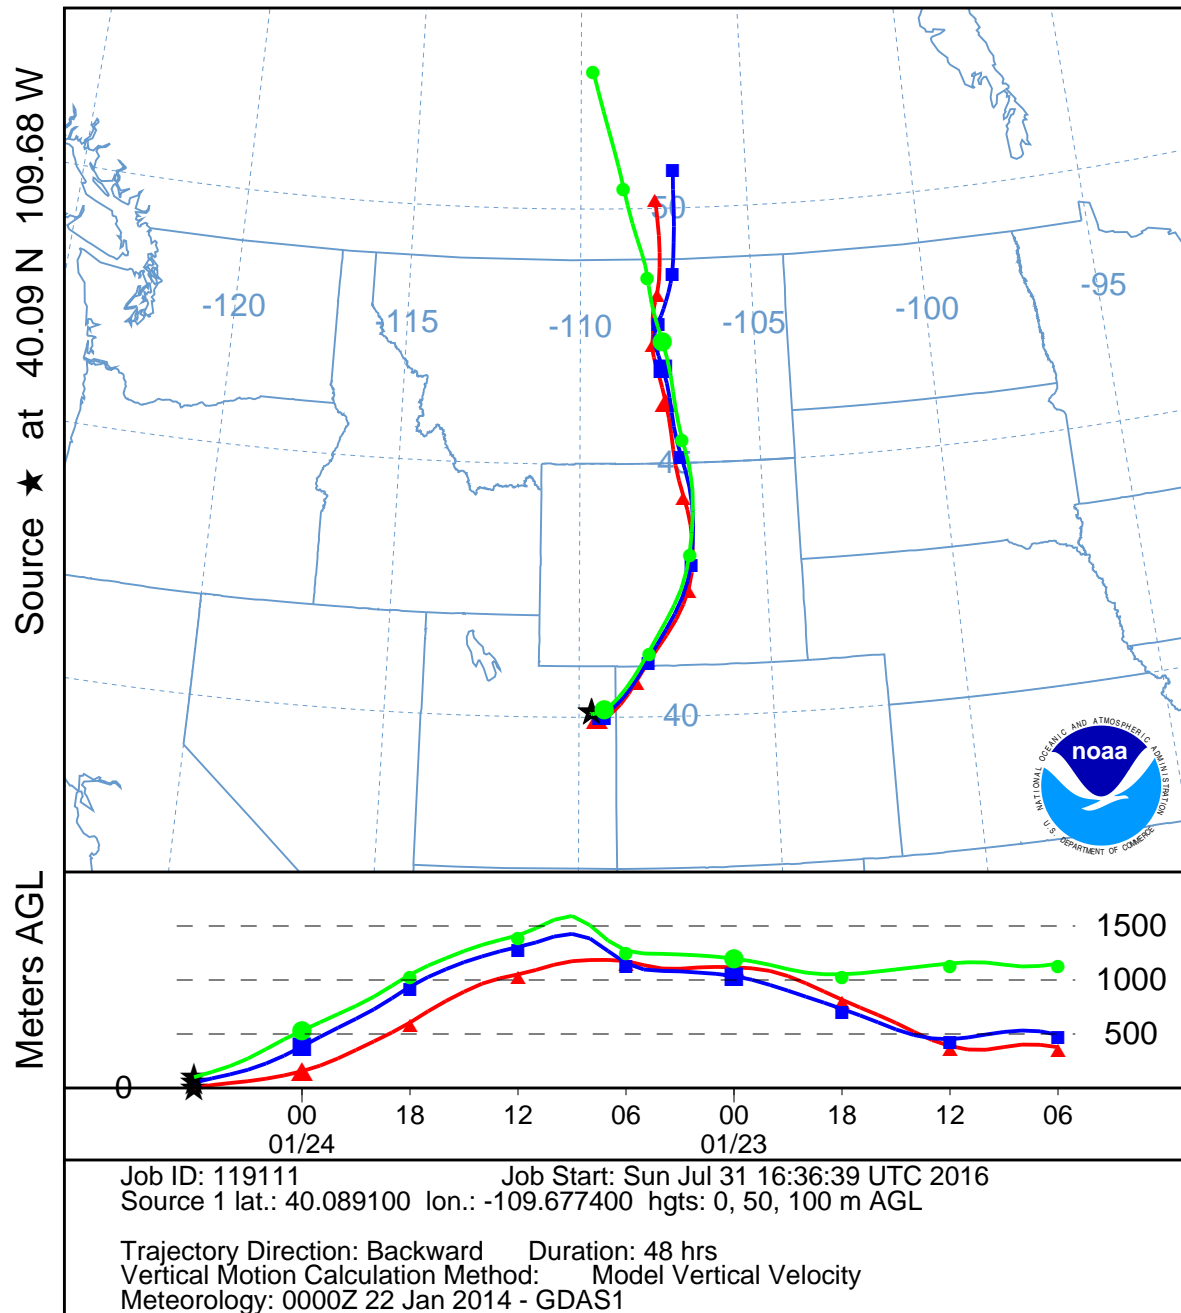

Supplement: Supplementary file 10 [file acp-16-13837-2016-supplement.zip]

NOAA HYSPLIT MODEL  
Backward trajectories ending at 0600 UTC 15 Jan 14  
GDAS Meteorological Data

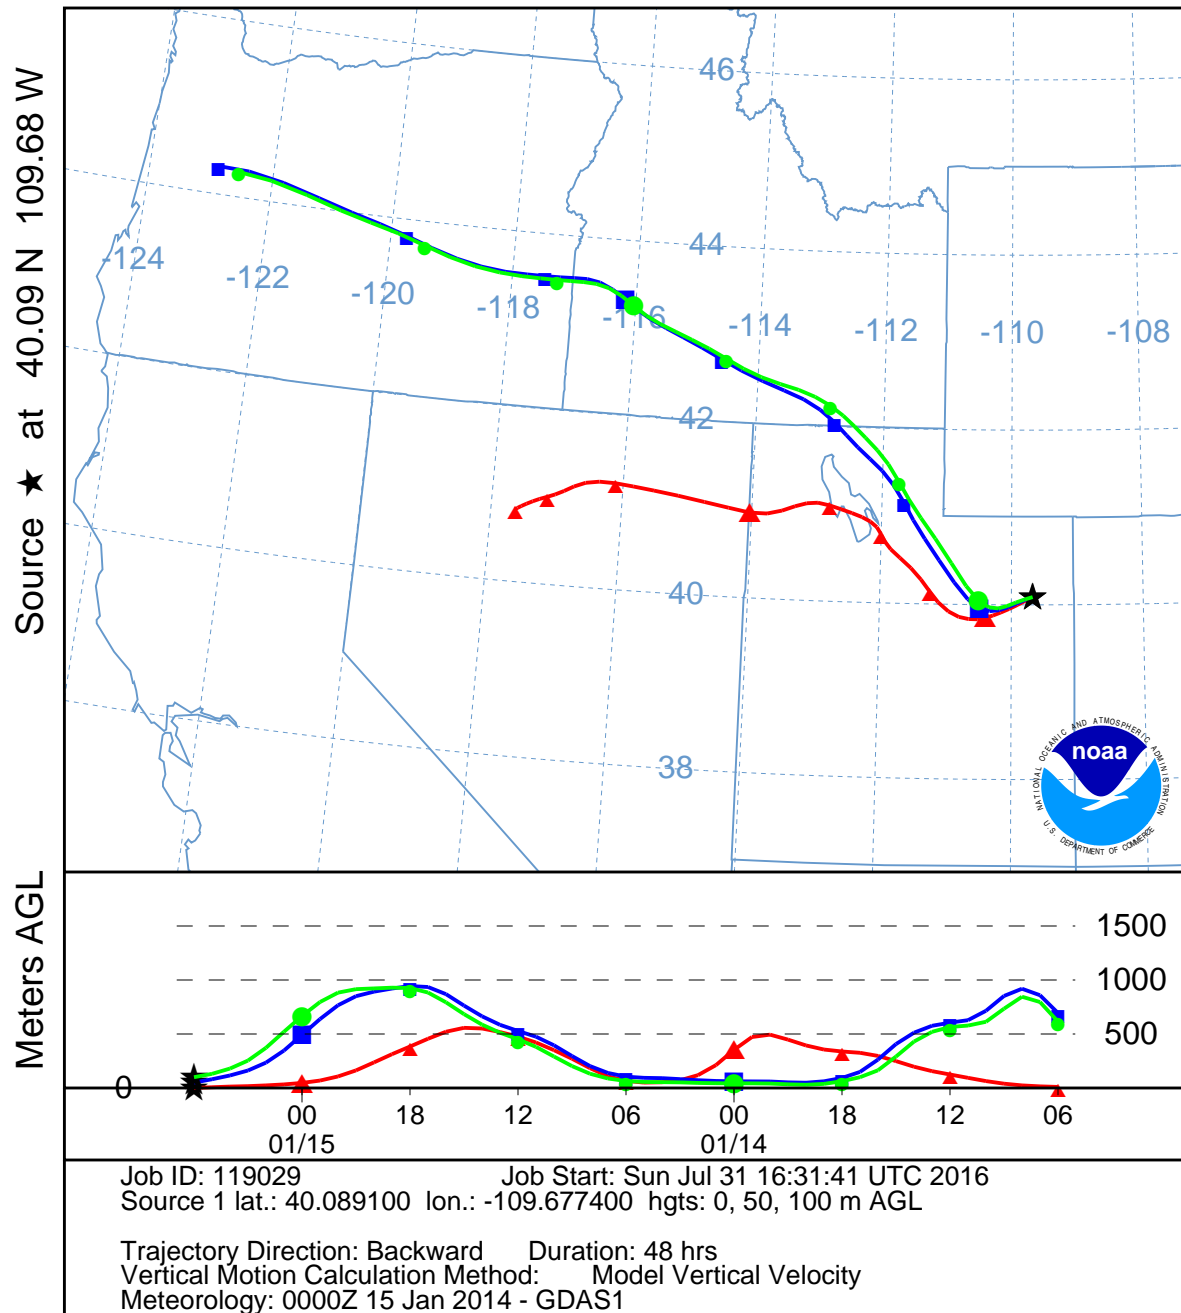

Supplement: Supplementary file 11 [file acp-16-13837-2016-supplement.zip]

NOAA HYSPLIT MODEL  
Backward trajectories ending at 0600 UTC 29 Jan 14  
GDAS Meteorological Data

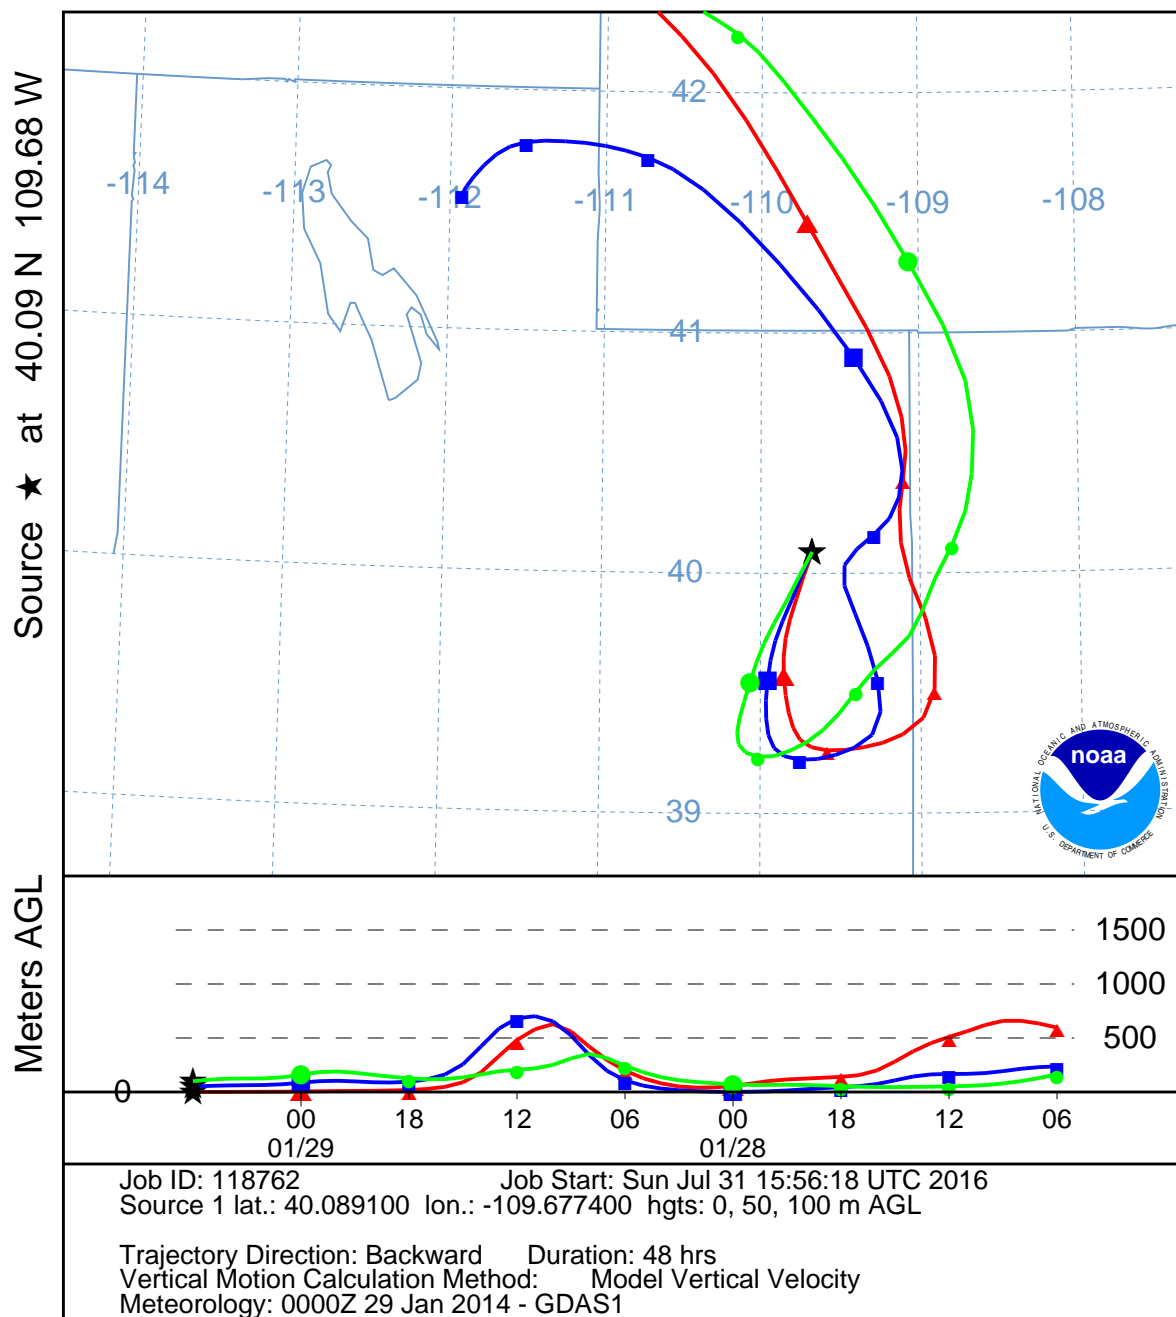

Supplement: Supplementary file 12 [file acp-16-13837-2016-supplement.zip]

NOAA HYSPLIT MODEL  
Backward trajectories ending at 0600 UTC 30 Jan 14  
GDAS Meteorological Data

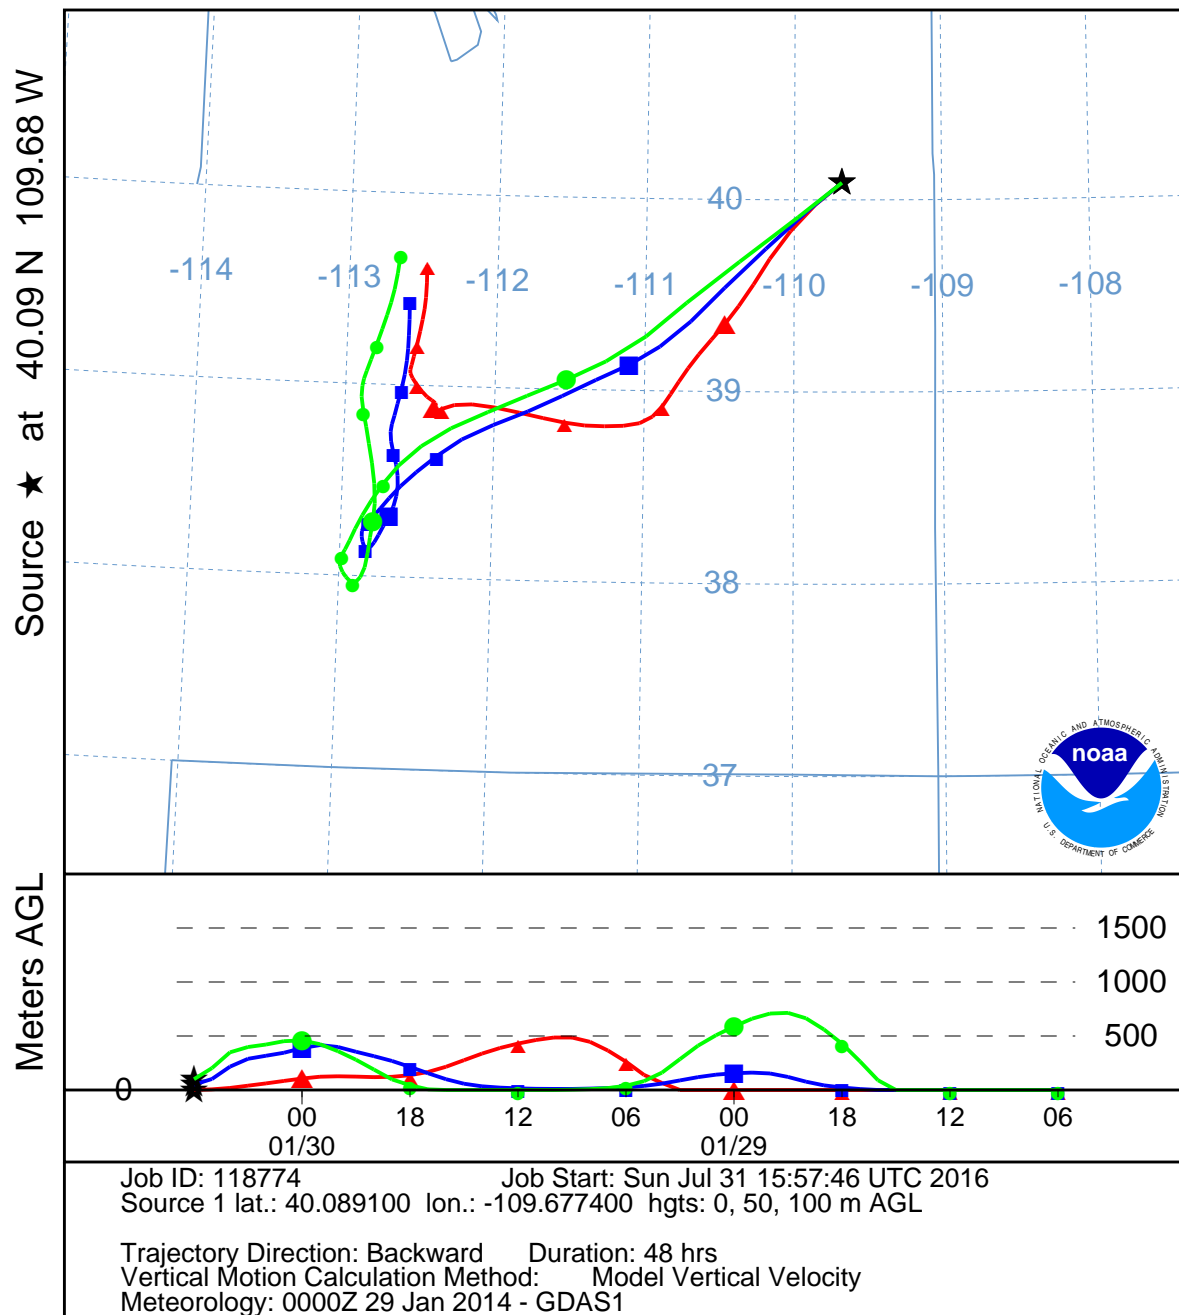

Supplement: Supplementary file 14 [file acp-16-13837-2016-supplement.zip]
